# Supplementary material for: School Bullying Is Not a Conflict: The Interplay between Conflict Management Styles, Bullying Victimization and Psychological School Adjustment
Source: MDPI journal article supplement (doi:10.3390/ijerph191811809), 2022-09-19
Supplement: s1 [file s1]

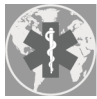

Supplementary Materials

# School bullying is not a conflict: The interplay between conflict management styles, bullying victimization and psychological school adjustment

Christoph Burger

**Supplementary Table S1.** Parameter Estimates of the Model with Victimization Mediating the Association Between Conflict Management Styles and Psychological School Adjustment.

| Predictors        | Outcome                  | Estimate         | SE    | z Value | p Value | 95%-CI Lower | 95%-CI Upper | Std (all) | Std (nox) |
|-------------------|--------------------------|------------------|-------|---------|---------|--------------|--------------|-----------|-----------|
| School adjustment | Victimization            | <b>−0.450***</b> | 0.061 | −7.367  | < 0.001 | −0.569       | −0.33        | −0.488    | −0.488    |
| School adjustment | Integrating              | <b>0.397*</b>    | 0.181 | 2.186   | 0.029   | 0.041        | 0.752        | 0.189     | 0.189     |
| School adjustment | Obliging                 | −0.195           | 0.160 | −1.222  | 0.222   | −0.508       | 0.118        | −0.095    | −0.095    |
| School adjustment | Avoiding                 | −0.161           | 0.107 | −1.513  | 0.130   | −0.370       | 0.048        | −0.111    | −0.111    |
| School adjustment | Dominating               | −0.129           | 0.101 | −1.269  | 0.204   | −0.327       | 0.070        | −0.089    | −0.089    |
| School adjustment | Compromising             | 0.098            | 0.164 | 0.597   | 0.551   | −0.223       | 0.418        | 0.048     | 0.048     |
| Victimization     | Integrating              | 0.111            | 0.230 | 0.484   | 0.628   | −0.340       | 0.563        | 0.049     | 0.049     |
| Victimization     | Obliging                 | −0.141           | 0.202 | −0.697  | 0.486   | −0.538       | 0.256        | −0.063    | −0.063    |
| Victimization     | Avoiding                 | 0.115            | 0.135 | 0.849   | 0.396   | −0.150       | 0.379        | 0.073     | 0.073     |
| Victimization     | Dominating               | −0.030           | 0.129 | −0.231  | 0.818   | −0.283       | 0.224        | −0.019    | −0.019    |
| Victimization     | Compromising             | −0.152           | 0.207 | −0.733  | 0.464   | −0.558       | 0.254        | −0.068    | −0.068    |
| Integrating       | Age                      | −0.021           | 0.022 | −0.957  | 0.338   | −0.065       | 0.022        | −0.072    | −0.033    |
| Integrating       | Class conflict frequency | <b>−0.173***</b> | 0.053 | −3.248  | 0.001   | −0.278       | −0.069       | −0.243    | −0.271    |
| Integrating       | Gender                   | −0.020           | 0.114 | −0.177  | 0.860   | −0.244       | 0.203        | −0.013    | −0.032    |
| Obliging          | Age                      | 0.008            | 0.023 | 0.331   | 0.741   | −0.037       | 0.052        | 0.025     | 0.012     |
| Obliging          | Class conflict frequency | <b>−0.170**</b>  | 0.055 | −3.110  | 0.002   | −0.277       | −0.063       | −0.233    | −0.261    |
| Obliging          | Gender                   | −0.036           | 0.117 | −0.310  | 0.756   | −0.265       | 0.192        | −0.023    | −0.056    |
| Avoiding          | Age                      | −0.022           | 0.033 | −0.690  | 0.490   | −0.086       | 0.041        | −0.052    | −0.024    |
| Avoiding          | Class conflict frequency | −0.134‡          | 0.078 | −1.719  | 0.086   | −0.286       | 0.019        | −0.130    | −0.145    |
| Avoiding          | Gender                   | <b>−0.355*</b>   | 0.166 | −2.136  | 0.033   | −0.681       | −0.029       | −0.161    | −0.385    |
| Dominating        | Age                      | −0.005           | 0.033 | −0.149  | 0.881   | −0.069       | 0.060        | −0.011    | −0.005    |
| Dominating        | Class conflict frequency | <b>0.172*</b>    | 0.079 | 2.185   | 0.029   | 0.018        | 0.326        | 0.165     | 0.185     |
| Dominating        | Age                      | 0.223            | 0.168 | 1.328   | 0.184   | −0.106       | 0.552        | 0.101     | 0.240     |
| Compromising      | Class conflict frequency | −0.019           | 0.023 | −0.810  | 0.418   | −0.064       | 0.027        | −0.061    | −0.029    |
| Compromising      | Gender                   | <b>−0.124*</b>   | 0.055 | −2.242  | 0.025   | −0.233       | −0.016       | −0.170    | −0.190    |
| Compromising      | Gender                   | 0.042            | 0.119 | 0.355   | 0.723   | −0.190       | 0.275        | 0.027     | 0.064     |
| Victimization     | Age                      | −0.050           | 0.048 | −1.037  | 0.300   | −0.144       | 0.044        | −0.073    | −0.034    |
| Victimization     | Class conflict frequency | <b>0.658***</b>  | 0.121 | 5.449   | < 0.001 | 0.421        | 0.895        | 0.405     | 0.453     |
| Victimization     | Gender                   | −0.117           | 0.248 | −0.471  | 0.638   | −0.602       | 0.369        | −0.034    | −0.080    |
| School adjustment | Age                      | 0.037            | 0.038 | 0.987   | 0.323   | −0.037       | 0.112        | 0.060     | 0.028     |
| School adjustment | Class conflict frequency | −0.191‡          | 0.103 | −1.851  | 0.064   | −0.394       | 0.011        | −0.128    | −0.143    |
| School adjustment | Gender                   | 0.126            | 0.195 | 0.644   | 0.519   | −0.257       | 0.508        | 0.039     | 0.094     |

Note. Calculated with JASP[72]. Delta method standard errors; full information maximum likelihood estimator. Std = standardized estimates. Significant estimates ( $p \leq 0.05$ ) are displayed in bold.

‡  $p \leq 0.10$ , \*  $p \leq 0.05$ , \*\*  $p \leq 0.01$ , \*\*\*  $p \leq 0.001$

**Supplementary Table S2.** Integrating Conflict Management Style: Conditional Effect of the Focal Predictor Victimization on School Adjustment.

| Integrating conflict management style (moderator) | Conditional effects of victimization on school adjustment | Heteroscedasticity-consistent SE | t Value | p Value | Lower level 95% CI | Upper level 95% CI |
|---------------------------------------------------|-----------------------------------------------------------|----------------------------------|---------|---------|--------------------|--------------------|
| 1.000 (–2.945)                                    | 0.258                                                     | 0.353                            | 0.730   | 0.467   | –0.440             | 0.955              |
| 1.200 (–2.745)                                    | 0.209                                                     | 0.329                            | 0.634   | 0.527   | –0.441             | 0.858              |
| 1.400 (–2.545)                                    | 0.160                                                     | 0.305                            | 0.524   | 0.601   | –0.442             | 0.761              |
| 1.600 (–2.345)                                    | 0.111                                                     | 0.280                            | 0.394   | 0.694   | –0.443             | 0.665              |
| 1.800 (–2.145)                                    | 0.062                                                     | 0.257                            | 0.240   | 0.811   | –0.445             | 0.568              |
| 2.000 (–1.945)                                    | 0.013                                                     | 0.233                            | 0.054   | 0.957   | –0.447             | 0.472              |
| 2.200 (–1.745)                                    | –0.036                                                    | 0.209                            | –0.174  | 0.862   | –0.450             | 0.377              |
| 2.400 (–1.545)                                    | –0.085                                                    | 0.186                            | –0.459  | 0.647   | –0.453             | 0.282              |
| 2.600 (–1.345)                                    | –0.134                                                    | 0.163                            | –0.823  | 0.412   | –0.457             | 0.188              |
| 2.800 (–1.145)                                    | –0.183                                                    | 0.141                            | –1.298  | 0.196   | –0.462             | 0.096              |
| 3.000 (–0.945)                                    | –0.232‡                                                   | 0.120                            | –1.930  | 0.055   | –0.470             | 0.006              |
| 3.012 (–0.933)                                    | <b>–0.235*</b>                                            | 0.119                            | –1.976  | 0.050   | –0.471             | 0.000              |
| 3.200 (–0.745)                                    | <b>–0.281**</b>                                           | 0.101                            | –2.779  | 0.006   | –0.481             | –0.081             |
| 3.303 (–0.642) <sup>1</sup>                       | <b>–0.307***</b>                                          | 0.092                            | –3.318  | 0.001   | –0.489             | –0.124             |
| 3.400 (–0.545)                                    | <b>–0.330***</b>                                          | 0.085                            | –3.882  | < 0.001 | –0.498             | –0.162             |
| 3.600 (–0.345)                                    | <b>–0.379***</b>                                          | 0.074                            | –5.131  | < 0.001 | –0.525             | –0.233             |
| 3.800 (–0.145)                                    | <b>–0.428***</b>                                          | 0.070                            | –6.105  | < 0.001 | –0.567             | –0.290             |
| 3.945 (0.000) <sup>2</sup>                        | <b>–0.464***</b>                                          | 0.073                            | –6.372  | < 0.001 | –0.608             | –0.320             |
| 4.000 (0.055)                                     | <b>–0.477***</b>                                          | 0.075                            | –6.372  | < 0.001 | –0.625             | –0.329             |
| 4.200 (0.255)                                     | <b>–0.526***</b>                                          | 0.087                            | –6.064  | < 0.001 | –0.698             | –0.355             |
| 4.400 (0.455)                                     | <b>–0.575***</b>                                          | 0.103                            | –5.565  | < 0.001 | –0.779             | –0.371             |
| 4.587 (0.642) <sup>3</sup>                        | <b>–0.621***</b>                                          | 0.121                            | –5.114  | < 0.001 | –0.861             | –0.381             |
| 4.600 (0.655)                                     | <b>–0.624***</b>                                          | 0.123                            | –5.085  | < 0.001 | –0.867             | –0.382             |
| 4.800 (0.855)                                     | <b>–0.673***</b>                                          | 0.144                            | –4.681  | < 0.001 | –0.957             | –0.389             |
| 5.000 (1.055)                                     | <b>–0.722***</b>                                          | 0.166                            | –4.352  | < 0.001 | –1.050             | –0.394             |

*Note.* Numbers in brackets represent mean-centered values. The PROCESS Macro[73] (model 1) was used with a heteroscedasticity consistent standard error (Huber-White) to obtain the Johnson-Neyman output. The value 3.012 (–0.933) of the moderator variable integrating conflict management style defines the lower boundary of the Johnson-Neyman significance region (7.78% of values below, 92.22% above). Significant values ( $p \leq 0.05$ ) are formatted in bold.

<sup>1</sup>  $M - 1SD$ ; <sup>2</sup>  $M$ ; <sup>3</sup>  $M + 1SD$

‡  $p \leq 0.10$ , \*  $p \leq 0.05$ , \*\*  $p \leq 0.01$ , \*\*\*  $p \leq 0.001$
